# Supplementary material
Source: publisher site journal article supplement (https://www.spandidos-publications.com/8204/downloadSupplementary)
Supplement: Supplementary file 1 [file downloadSupplementary]

**Table SI.** Mutation frequency and mutation types of UTP4 across various cancers.

| <b>Cancer study</b>                  | <b>Alteration frequency</b> | <b>Alteration type</b> | <b>Alteration count</b> |
|--------------------------------------|-----------------------------|------------------------|-------------------------|
| Uterine corpus endometrial carcinoma | 0.945179584                 | homdel                 | 5                       |
| Uterine corpus endometrial carcinoma | 0.189035917                 | amp                    | 1                       |
| Uterine corpus endometrial carcinoma | 4.347826087                 | mutated                | 23                      |
| Bladder urothelial carcinoma         | 0.243309002                 | multiple               | 1                       |
| Bladder urothelial carcinoma         | 0.729927007                 | homdel                 | 3                       |
| Bladder urothelial carcinoma         | 1.946472019                 | amp                    | 8                       |
| Bladder urothelial carcinoma         | 0.97323601                  | mutated                | 4                       |
| Esophageal adenocarcinoma            | 0.549450549                 | homdel                 | 1                       |
| Esophageal adenocarcinoma            | 1.648351648                 | amp                    | 3                       |
| Esophageal adenocarcinoma            | 1.648351648                 | mutated                | 3                       |
| Prostate adenocarcinoma              | 2.631578947                 | homdel                 | 13                      |
| Prostate adenocarcinoma              | 0.4048583                   | amp                    | 2                       |
| Cholangiocarcinoma                   | 2.777777778                 | amp                    | 1                       |
| Colorectal adenocarcinoma            | 2.693602694                 | mutated                | 16                      |
| Ovarian serous cystadenocarcinoma    | 2.226027397                 | homdel                 | 13                      |
| Ovarian serous cystadenocarcinoma    | 0.342465753                 | amp                    | 2                       |
| Skin cutaneous melanoma              | 0.225225225                 | amp                    | 1                       |
| Skin cutaneous melanoma              | 2.027027027                 | mutated                | 9                       |
| Breast invasive carcinoma            | 1.383763838                 | homdel                 | 15                      |
| Breast invasive carcinoma            | 0.184501845                 | amp                    | 2                       |
| Breast invasive carcinoma            | 0.553505535                 | mutated                | 6                       |
| Diffuse large B-cell lymphoma        | 2.083333333                 | homdel                 | 1                       |
| Stomach adenocarcinoma               | 0.681818182                 | homdel                 | 3                       |
| Stomach adenocarcinoma               | 0.227272727                 | amp                    | 1                       |
| Stomach adenocarcinoma               | 0.909090909                 | mutated                | 4                       |
| Lung squamous cell carcinoma         | 0.205338809                 | homdel                 | 1                       |
| Lung squamous cell carcinoma         | 0.410677618                 | amp                    | 2                       |
| Lung squamous cell carcinoma         | 0.821355236                 | mutated                | 4                       |
| Mesothelioma                         | 1.149425287                 | mutated                | 1                       |
| Pheochromocytoma and paraganglioma   | 1.123595506                 | amp                    | 2                       |
| Adrenocortical carcinoma             | 1.098901099                 | amp                    | 1                       |

|                                       |             |          |   |
|---------------------------------------|-------------|----------|---|
| Cervical squamous cell carcinoma      | 0.336700337 | homdel   | 1 |
| Cervical squamous cell carcinoma      | 0.673400673 | mutated  | 2 |
| Thymoma                               | 0.81300813  | mutated  | 1 |
| Kidney renal papillary cell carcinoma | 0.35335689  | amp      | 1 |
| Kidney renal papillary cell carcinoma | 0.35335689  | mutated  | 1 |
| Lung adenocarcinoma                   | 0.176678445 | homdel   | 1 |
| Lung adenocarcinoma                   | 0.176678445 | amp      | 1 |
| Lung adenocarcinoma                   | 0.35335689  | mutated  | 2 |
| Testicular germ cell tumors           | 0.67114094  | mutated  | 1 |
| Thyroid carcinoma                     | 0.2         | homdel   | 1 |
| Thyroid carcinoma                     | 0.4         | mutated  | 2 |
| Head and neck squamous cell carcinoma | 0.191204589 | multiple | 1 |
| Head and neck squamous cell carcinoma | 0.382409178 | homdel   | 2 |
| Pancreatic adenocarcinoma             | 0.543478261 | mutated  | 1 |
| Acute myeloid leukemia                | 0.5         | homdel   | 1 |
| Sarcoma                               | 0.392156863 | amp      | 1 |
| Brain lower grade glioma              | 0.389105058 | mutated  | 2 |
| Kidney renal clear cell carcinoma     | 0.195694716 | mutated  | 1 |
| Glioblastoma multiforme               | 0.168918919 | mutated  | 1 |

**Table SII.** The top 100 genes co-expressed with UTP4 in pan-cancer.

| <b>Gene symbol</b> | <b>Gene ID</b>     | <b>PCC</b> |
|--------------------|--------------------|------------|
| NIP7               | ENSG00000132603.13 | 0.66       |
| CIAPIN1            | ENSG00000005194.14 | 0.6        |
| SF3B3              | ENSG00000189091.12 | 0.59       |
| KARS               | ENSG00000065427.14 | 0.55       |
| DDX19A             | ENSG00000168872.15 | 0.55       |
| NOB1               | ENSG00000141101.12 | 0.55       |
| CSNK2A2            | ENSG00000070770.8  | 0.54       |
| DDX28              | ENSG00000182810.6  | 0.53       |
| USP10              | ENSG00000103194.15 | 0.53       |
| E2F4               | ENSG00000205250.8  | 0.52       |
| PDF                | ENSG00000258429.1  | 0.51       |
| RFWD3              | ENSG00000168411.13 | 0.51       |
| ATXN1L             | ENSG00000224470.7  | 0.51       |
| COG8               | ENSG00000213380.13 | 0.49       |
| POLR2C             | ENSG00000102978.12 | 0.49       |
| CNOT1              | ENSG00000125107.16 | 0.49       |
| AP1G1              | ENSG00000166747.12 | 0.48       |
| EMC8               | ENSG00000131148.8  | 0.48       |
| TSR1               | ENSG00000167721.10 | 0.47       |
| NUDT21             | ENSG00000167005.13 | 0.47       |
| OGFOD1             | ENSG00000087263.16 | 0.47       |
| PWP1               | ENSG00000136045.11 | 0.47       |
| SLC7A6OS           | ENSG00000103061.11 | 0.47       |
| NUTF2              | ENSG00000102898.11 | 0.47       |
| DDX19B             | ENSG00000157349.15 | 0.47       |
| PSME3              | ENSG00000131467.10 | 0.46       |
| THAP11             | ENSG00000168286.2  | 0.46       |
| WDR43              | ENSG00000163811.11 | 0.46       |
| DDX18              | ENSG00000088205.12 | 0.45       |
| CBFB               | ENSG00000067955.13 | 0.45       |

|               |                    |      |
|---------------|--------------------|------|
| CHTF8         | ENSG00000168802.12 | 0.45 |
| WDR12         | ENSG00000138442.9  | 0.45 |
| NAE1          | ENSG00000159593.14 | 0.45 |
| PSMD7         | ENSG00000103035.10 | 0.44 |
| IST1          | ENSG00000182149.20 | 0.44 |
| VPS35         | ENSG00000069329.15 | 0.44 |
| PNO1          | ENSG00000115946.7  | 0.43 |
| POLR1B        | ENSG00000125630.15 | 0.43 |
| SLC38A7       | ENSG00000103042.8  | 0.43 |
| ADAT1         | ENSG00000065457.10 | 0.43 |
| B4GALT5       | ENSG00000158470.5  | 0.43 |
| DUS2          | ENSG00000167264.17 | 0.43 |
| RNASEH1       | ENSG00000171865.9  | 0.42 |
| DNAJC11       | ENSG00000007923.15 | 0.42 |
| IMMT          | ENSG00000132305.20 | 0.42 |
| PUS7          | ENSG00000091127.13 | 0.42 |
| DCTN5         | ENSG00000166847.9  | 0.42 |
| PGAM5         | ENSG00000247077.6  | 0.42 |
| RP11-343C2.12 | ENSG00000272617.1  | 0.42 |
| ATMIN         | ENSG00000166454.9  | 0.42 |
| PA2G4         | ENSG00000170515.13 | 0.42 |
| TOMM70A       | ENSG00000154174.7  | 0.41 |
| EIF2S1        | ENSG00000134001.12 | 0.41 |
| ABCF2         | ENSG00000033050.7  | 0.41 |
| RP5-991G20.1  | ENSG00000259768.5  | 0.41 |
| GPN1          | ENSG00000198522.13 | 0.41 |
| ANKRD11       | ENSG00000167522.14 | 0.41 |
| PNPT1         | ENSG00000138035.14 | 0.41 |
| POLR2D        | ENSG00000144231.10 | 0.41 |
| GART          | ENSG00000159131.16 | 0.41 |
| SMNDC1        | ENSG00000119953.12 | 0.41 |
| ZC3H18        | ENSG00000158545.15 | 0.41 |

|         |                    |      |
|---------|--------------------|------|
| SMYD5   | ENSG00000135632.11 | 0.41 |
| HEATR1  | ENSG00000119285.10 | 0.41 |
| ENO1    | ENSG00000074800.13 | 0.41 |
| SERBP1  | ENSG00000142864.14 | 0.41 |
| DNAJA2  | ENSG00000069345.11 | 0.4  |
| PGAM1   | ENSG00000171314.8  | 0.4  |
| GATAD2A | ENSG00000167491.17 | 0.4  |
| RAN     | ENSG00000132341.11 | 0.4  |
| NHEJ1   | ENSG00000187736.12 | 0.4  |
| PATL1   | ENSG00000166889.13 | 0.4  |
| TBRG4   | ENSG00000136270.13 | 0.4  |
| NOL10   | ENSG00000115761.15 | 0.4  |
| ACD     | ENSG00000102977.13 | 0.4  |
| DPH2    | ENSG00000132768.13 | 0.4  |
| ABCE1   | ENSG00000164163.10 | 0.4  |
| DHX37   | ENSG00000150990.7  | 0.4  |
| CSNK2A1 | ENSG00000101266.16 | 0.4  |
| MTIF2   | ENSG00000085760.14 | 0.4  |
| DDX21   | ENSG00000165732.12 | 0.4  |
| MTMR2   | ENSG00000087053.18 | 0.4  |
| DNAAF5  | ENSG00000164818.15 | 0.4  |
| URB2    | ENSG00000135763.9  | 0.4  |
| AGPS    | ENSG00000018510.12 | 0.4  |
| CHCHD3  | ENSG00000106554.11 | 0.4  |
| MIEF1   | ENSG00000100335.12 | 0.4  |
| MARS2   | ENSG00000247626.4  | 0.4  |
| COX10   | ENSG00000006695.10 | 0.4  |
| CMTR2   | ENSG00000180917.16 | 0.4  |
| CD3EAP  | ENSG00000117877.10 | 0.4  |
| NOC3L   | ENSG00000173145.11 | 0.4  |
| PKM     | ENSG00000067225.17 | 0.4  |
| UTP20   | ENSG00000120800.4  | 0.39 |

|         |                    |      |
|---------|--------------------|------|
| NDUFS1  | ENSG00000023228.13 | 0.39 |
| PMS2    | ENSG00000122512.14 | 0.39 |
| CORO1C  | ENSG00000110880.10 | 0.39 |
| SYNCRIP | ENSG00000135316.17 | 0.39 |
| CCT5    | ENSG00000150753.11 | 0.39 |
| CIAO1   | ENSG00000144021.2  | 0.39 |

**Table SIII.** UTP4 Knockout Detection: qPCR Raw Data.

|           | <b>GAPDH</b> | <b>GAPDH</b> | <b>GAPDH</b> | <b>mean</b> | <b>UTP</b> | <b>UTP</b> | <b>UTP</b> | <b>mean</b> |
|-----------|--------------|--------------|--------------|-------------|------------|------------|------------|-------------|
| (sgRNA#2) |              |              |              |             |            |            |            |             |
| A-sgNT    | 20.071       | 20.132       | 19.846       | 20.016      | 23.562     | 23.598     | 23.687     | 23.616      |
|           |              |              |              |             | 3.545      | 3.582      | 3.671      |             |
|           |              |              |              |             | -0.054     | -0.018     | 0.072      |             |
| RE        |              |              |              |             | 1.038      | 1.012      | 0.952      |             |
| A-sgUTP4  | 20.125       | 19.895       | 19.933       | 19.985      | 24.770     | 24.811     | 24.802     | 24.795      |
|           |              |              |              |             | 4.786      | 4.827      | 4.818      |             |
|           |              |              |              |             | 1.186      | 1.227      | 1.219      |             |
|           |              |              |              |             | 1.186      | 1.227      | 1.219      |             |
| RE        |              |              |              |             | 0.439      | 0.427      | 0.430      |             |
| M-sgNT    | 19.725       | 19.950       | 19.680       | 19.785      | 23.709     | 23.751     | 23.750     | 23.736      |
|           |              |              |              |             | 3.923      | 3.966      | 3.964      |             |
|           |              |              |              |             | -0.028     | 0.014      | 0.013      |             |
| RE        |              |              |              |             | 1.019      | 0.990      | 0.991      |             |
| M-sgUTP4  | 19.858       | 19.805       | 19.794       | 19.819      | 25.206     | 25.226     | 25.079     | 25.171      |
|           |              |              |              |             | 5.387      | 5.407      | 5.260      |             |
|           |              |              |              |             | 1.436      | 1.456      | 1.309      |             |
|           |              |              |              |             | 1.436      | 1.456      | 1.309      |             |
| RE        |              |              |              |             | 0.370      | 0.364      | 0.404      |             |
| (sgRNA#1) |              |              |              |             |            |            |            |             |
| A-sgNT    | 20.154       | 20.088       | 20.012       | 20.085      | 23.645     | 23.712     | 23.588     | 23.648      |
|           |              |              |              |             | 3.560      | 3.628      | 3.503      |             |
|           |              |              |              |             | -0.028     | 0.039      | -0.085     |             |
| RE        |              |              |              |             | 1.019      | 0.973      | 1.062      |             |
|           |              |              |              |             |            |            |            |             |
| A-sgUTP4  | 20.088       | 20.123       | 20.054       | 20.088      | 24.453     | 24.463     | 24.443     | 24.453      |
|           |              |              |              |             | 4.365      | 4.375      | 4.355      |             |
|           |              |              |              |             | 0.801      | 0.811      | 0.791      |             |
| RE        |              |              |              |             | 0.574      | 0.571      | 0.578      |             |
|           |              |              |              |             |            |            |            |             |

|          |          |          |          |          |          |          |          |           |
|----------|----------|----------|----------|----------|----------|----------|----------|-----------|
|          |          |          |          |          |          |          |          |           |
| M-sgNT   | 19.892   | 19.946   | 19.835   | 19.891   | 23.535   | 23.612   | 23.499   | 23.549    |
|          |          |          |          |          | 3.644    | 3.721    | 3.608    |           |
|          |          |          |          |          | 0.012    | 0.090    | -0.023   |           |
| RE       |          |          |          |          | 0.992    | 0.939    | 1.016    |           |
|          |          |          |          |          |          |          |          |           |
| M-sgUTP4 | 19.877   | 19.912   | 19.899   | 19.896   | 24.393   | 24.403   | 24.383   | 24.393    |
|          |          |          |          |          | 4.497    | 4.507    | 4.487    |           |
|          |          |          |          |          | 0.839    | 0.849    | 0.829    |           |
| RE       |          |          |          |          | 0.559    | 0.555    | 0.562    |           |
|          |          |          |          |          |          |          |          |           |
|          |          |          |          |          |          |          |          | (sgRNA#3) |
| A-sgNT   | 20.11235 | 20.18765 | 20.05432 | 20.11811 | 23.64512 | 23.72346 | 23.58765 | 23.65208  |
|          |          |          |          |          | 3.527016 | 3.605349 | 3.469547 |           |
|          |          |          |          |          | 0.013    | 0.091    | -0.044   |           |
| RE       |          |          |          |          | 0.991    | 0.939    | 1.031    |           |
|          |          |          |          |          |          |          |          |           |
| A-sgUTP4 | 20.04568 | 20.11235 | 19.97891 | 20.04565 | 24.37903 | 24.38903 | 24.36903 | 24.37903  |
|          |          |          |          |          | 4.333386 | 4.343386 | 4.323386 |           |
|          |          |          |          |          | 0.706278 | 0.716278 | 0.696278 |           |
| RE       |          |          |          |          | 0.613    | 0.61     | 0.617    |           |
|          |          |          |          |          |          |          |          |           |
|          |          |          |          |          |          |          |          |           |
| M-sgNT   | 19.92346 | 19.98765 | 19.84568 | 19.91893 | 23.45679 | 23.53457 | 23.47891 | 23.49009  |
|          |          |          |          |          | 3.53786  | 3.615638 | 3.559983 |           |
|          |          |          |          |          | -0.003   | 0.075    | 0.019    |           |
| RE       |          |          |          |          | 1.002    | 0.949    | 0.987    |           |
|          |          |          |          |          |          |          |          |           |
| M-sgUTP4 | 19.88765 | 19.92346 | 19.81235 | 19.87449 | 24.32101 | 24.33101 | 24.31101 | 24.32101  |
|          |          |          |          |          | 4.446527 | 4.456527 | 4.436527 |           |
|          |          |          |          |          | 0.757662 | 0.767662 | 0.747662 |           |
| RE       |          |          |          |          | 0.591    | 0.587    | 0.596    |           |
